# Supplementary material for: Allelic expression analysis of the osteoarthritis susceptibility locus that maps to chromosome 3p21 reveals cis-acting eQTLs at GNL3 and SPCS1
Source: PubMed Central journal article supplement (PMC4101866; doi:10.1186/1471-2350-15-53), 2014-05-04
Supplement: 1471-2350-15-53-S1.pdf [file 1471-2350-15-53-S1.pdf]

**Additional file 1.** Table of patient characteristics and their genotype at rs6976.

| <b>Patient</b> | <b>Sex</b> | <b>Age at surgery (years)</b> | <b>Joint replacement at surgery</b> | <b>Tissue type</b> | <b>rs6976 genotype</b> |
|----------------|------------|-------------------------------|-------------------------------------|--------------------|------------------------|
| 1              | M          | 62                            | K                                   | Cn                 | TT                     |
| 2              | M          | 76                            | K                                   | Cn, FP             | CT                     |
| 3              | M          | 57                            | K                                   | Cn                 | CT                     |
| 4              | M          | 69                            | K                                   | Cn, Sy             | CT                     |
| 5              | F          | 67                            | K                                   | Cn                 | CC                     |
| 6              | F          | 69                            | K                                   | Cn                 | CC                     |
| 7              | F          | 64                            | K                                   | Cn                 | CC                     |
| 8              | M          | 86                            | K                                   | Cn                 | CT                     |
| 9              | F          | 80                            | K                                   | Cn                 | CT                     |
| 10             | F          | 61                            | K                                   | Cn                 | CT                     |
| 11             | M          | 72                            | K                                   | Cn                 | CC                     |
| 12             | M          | 71                            | H                                   | Cn                 | CT                     |
| 13             | M          | 71                            | K                                   | Cn                 | CC                     |
| 14             | F          | 59                            | H                                   | Cn                 | CC                     |
| 15             | M          | 78                            | K                                   | Cn                 | CT                     |
| 16             | M          | 53                            | K                                   | Cn                 | TT                     |
| 17             | M          | 65                            | K                                   | Cn                 | CC                     |
| 18             | M          | 85                            | H                                   | Cn                 | TT                     |
| 19             | F          | 79                            | K                                   | Cn                 | CT                     |
| 20             | F          | 88                            | K                                   | Cn                 | CT                     |
| 21             | F          | 68                            | H                                   | Cn                 | CT                     |
| 22             | F          | 76                            | H                                   | Cn                 | CT                     |
| 23             | F          | 71                            | K                                   | Cn                 | CC                     |
| 24             | F          | 61                            | K                                   | Cn                 | CT                     |
| 25             | F          | 64                            | K                                   | Cn                 | CT                     |
| 26             | F          | 79                            | K                                   | Cn                 | TT                     |
| 27             | F          | 60                            | K                                   | Cn                 | TT                     |
| 28             | M          | 65                            | K                                   | Cn                 | CT                     |
| 29             | F          | 72                            | K                                   | Cn                 | CT                     |
| 30             | M          | 85                            | K                                   | Cn                 | CT                     |
| 31             | F          | 54                            | K                                   | Cn                 | CC                     |
| 32             | F          | 76                            | K                                   | Cn                 | CT                     |
| 33             | F          | 72                            | K                                   | Cn                 | CT                     |
| 34             | F          | 72                            | K                                   | Cn                 | CC                     |
| 35             | F          | 59                            | H                                   | Cn                 | CT                     |
| 36             | M          | 90                            | H                                   | Cn                 | CT                     |
| 37             | F          | 73                            | K                                   | Cn                 | CC                     |
| 38             | F          | 68                            | K                                   | Cn                 | CT                     |
| 39             | M          | 81                            | K                                   | Cn                 | CC                     |
| 40             | M          | 56                            | K                                   | Cn                 | CT                     |
| 41             | F          | 68                            | K                                   | Cn                 | TT                     |
| 42             | F          | 86                            | K                                   | Cn                 | CT                     |
| 43             | M          | 76                            | K                                   | Cn                 | CT                     |

|    |   |    |   |        |    |
|----|---|----|---|--------|----|
| 44 | M | 78 | H | Cn     | CT |
| 45 | F | 88 | K | Cn     | CC |
| 46 | F | 69 | K | Cn     | CT |
| 47 | M | 58 | K | Cn     | CT |
| 48 | F | 69 | K | Sy     | CT |
| 49 | F | 81 | K | FP     | CT |
| 50 | F | 55 | K | FP, Sy | CC |
| 51 | F | 81 | K | Sy, Me | CT |
| 52 | F | 65 | K | FP     | CC |
| 53 | F | 78 | K | FP, Sy | CT |
| 54 | M | 76 | K | Me     | CT |
| 55 | M | 65 | H | Li     | CT |
| 56 | M | 75 | K | FP     | CT |
| 57 | M | 74 | K | Sy     | CT |
| 58 | F | 78 | K | FP, Sy | TT |
| 59 | M | 56 | K | Sy     | CT |
| 60 | M | 67 | K | Sy     | CT |
| 61 | F | 67 | K | FP     | CT |
| 62 | F | 60 | K | FP     | CT |
| 63 | M | 71 | K | FP     | CT |
| 64 | F | 73 | K | Sy     | CT |

---

F, female; M, male; K, knee; H, hip; Cn, cartilage; FP, fat pad; Sy, synovium; Me, meniscus; Li, ligament
