# Supplementary material for: Allelic expression analysis of the osteoarthritis susceptibility locus that maps to chromosome 3p21 reveals cis-acting eQTLs at GNL3 and SPCS1
Source: PubMed Central journal article supplement (PMC4101866; doi:10.1186/1471-2350-15-53), 2014-05-04
Supplement: 1471-2350-15-53-S2.pdf [file 1471-2350-15-53-S2.pdf]

**Additional file 2.** The seven transcript SNPs and their pair-wise  $D'$  and  $r^2$  values relative to the associated SNP rs6976.

| Gene           | Transcript<br>SNP | Alleles<br>(major/minor) | MAF   | Pairwise linkage<br>disequilibrium<br>relative to rs6976 |       |
|----------------|-------------------|--------------------------|-------|----------------------------------------------------------|-------|
|                |                   |                          |       | $r^2$                                                    | $D'$  |
| <i>GNL3</i>    | rs11177           | C/T                      | 0.336 | 1.000                                                    | 1.000 |
| <i>SPCS1</i>   | rs6617            | C/G                      | 0.342 | 0.932                                                    | 1.000 |
| <i>PBRM1</i>   | rs17264436        | T/A                      | 0.317 | 0.965                                                    | 1.000 |
| <i>NT5DC2</i>  | rs7639267         | T/G                      | 0.492 | 0.521                                                    | 0.948 |
| <i>TMEM110</i> | rs6769789         | T/C                      | 0.336 | 0.224                                                    | 0.509 |
| <i>POC1A</i>   | rs747343          | T/C                      | 0.150 | 0.038                                                    | 0.612 |
| <i>GLT8D1</i>  | rs6976            | C/T                      | 0.336 | -                                                        | -     |

MAF, minor allele frequency in Europeans (HapMap CEU)
