# Supplementary material for: Allelic expression analysis of the osteoarthritis susceptibility locus that maps to chromosome 3p21 reveals cis-acting eQTLs at GNL3 and SPCS1
Source: PubMed Central journal article supplement (PMC4101866; doi:10.1186/1471-2350-15-53), 2014-05-04
Supplement: 1471-2350-15-53-S3.pdf [file 1471-2350-15-53-S3.pdf]

**Additional file 3.** Primer sequences used for genotyping and allelic expression analysis

| SNP        | Forward primer<br>(5'-3') | Reverse primer<br>(5'-3') | Sequencing primer<br>(5'-3') |
|------------|---------------------------|---------------------------|------------------------------|
| rs6976     | CATCTTTTTCCATGGCTTGCTACC  | TTCCAGACCCAACAGGCAAATT    | GCAACTGTTACTTCCCA            |
| rs11177    | GTTCGAGAACATCATCGAAAATTA  | TGTTTGGAACCTCTGGGTCTTT    | GGCTTCTTGTGACCC              |
| rs6617     | TTAGAAGGCCCGGCTACTGA      | CGAGGGCGACCGAGACTTA       | CGCAGTGCCAGACCT              |
| rs17264436 | GTTTCTTCCAGATTACTCA       | AGCTGCATATTTTTATGG        | CCCCATCTTCATTAC              |
| rs7639267  | CGCATTCTTCTGCTCAGATC      | ACTGCCACACTGTAGGTCTTCAA   | GTTGTTTTCTGAGGTGG            |
| rs747343   | AGCCGGGGTTTTCTCTAAAT      | ACCCACTTGAGAGGGCTTGT      | CACTTGAGAGGGCTTGT            |
| rs6769789  | AGCGGCAGAGACAGCAAG        | GCACCGCTTTGGGCTACC        | GGTAAGGAACGATGCT             |
